# Supplementary material
Source: PubMed Central journal article supplement (PMC3745541)
Supplement: NIHMS485756-supplement-Supp_Fig_S1-S4.pdf [file NIHMS485756-supplement-Supp_Fig_S1-S4.pdf]

## Supplementary Figure Legends:

**Figure S1. Sequence alignment of human VKOR and VKORC1L1.** The amino acid sequences of human VKOR and VKORC1L1 were aligned by CLUSTAL W. Completely conserved residues are shown in yellow with red background. Similar residues are shown in white with black background. Conserved loop cysteines are indicated by arrows. The active site CXXC redox motif is indicated by a bold line. Residues reported to be associated with warfarin resistance in patients and studied in this work are indicated by asterisks.

## **Figure S2. TALENs-mediated VKORC1L1 knockout in HEK 293 cells. (A)**

Functional screening of VKORC1L1 knockout HEK293 cells. The black and gray bars represent the concentrations of carboxylated FIXgla-PC in the cell culture medium when cells were fed with KO and vitamin K, respectively. Non-transfected HEK293 cells produce similar level of carboxylated FIXgla-PC when fed with either vitamin K or KO. **(B)** TALENs-mediated gene editing of VKORC1L1 locus in HEK293 cells. Wild-type VKORC1L1 target sequence is shown on the top with the TALENs binding site indicated. The ATG start codon is underlined. Deletions are indicated by dashes. Insertions are indicated by lowercase letters in italic or an “i” and the number of base pairs inserted against a gray background. The sizes of deletions or

insertions are indicated on the left. The sequence of the 343-base pair insertion is shown in lowercase letters in italic. In-frame stop-codon is indicated by a bold line.

**Figure S3. Large sequence insertion in TALENs-mediated VKORC1L1 genome**

**editing. (A)** A 343-bp nucleotide sequence insertion was identified in one of the TALENs-edited VKORC1L1 loci. The inserted nucleotide sequences are shown in lower case letters and the VKORC1L1 cDNA sequences are shown in bold capital letters. The ATG start codon is shown in red. The translated amino acid sequence is shown under the nucleotide sequence with VKORC1L1 sequence in bold. The first methionine is shown in blue and translation stop codons are indicated by red asterisks. **(B)** A BLAST search reveals that the 343-bp insert is from chromosome 5.

**Figure S4. Distribution of naturally occurring VKOR mutations in the three-**

**transmembrane domain topology model.** Amino acid residues that have been found to be mutated in patients requiring high-dose anticoagulants were highlighted in red. Conserved loop cysteines and the active site cysteines are highlighted in green.

VKOR  
 VKORC1L1

MGS - - - TWGSPGWVRLA - - - LCLTGLVLSLYALHVKAARRARDRDYRALCDVGTATISCSR  
 MAAPVLLRVSVPRWERVARYAVCAA GILLSIYAYHVEREKERDPEHRALCDLGPWVKCSA

VKOR  
 VKORC1L1

VFS \* \* \* \* SRWGRGFGLVEHVLGQDSILNQSNSIFGCIFYTLQLLGCLRTRWASVLMMLSSLVS  
 ALASRWGRGFGLLGSIFGKDGVLNQPNNSVFGLIFYILQLLGMTASAVAAALILMTSSIMS

VKOR  
 VKORC1L1

LAGSVYLAWILFFVL<sup>\*</sup>YDFCIVCITTYAINVSLMWLSFRK - - - VQEP - - - QGKAKRH  
 VVGSLYLAYILYFVLKEFCIICIVTYVNLNFLLLIINYKRLVYLN<sup>\*</sup>EAWKRQLQPKQD

Figure S1

**A**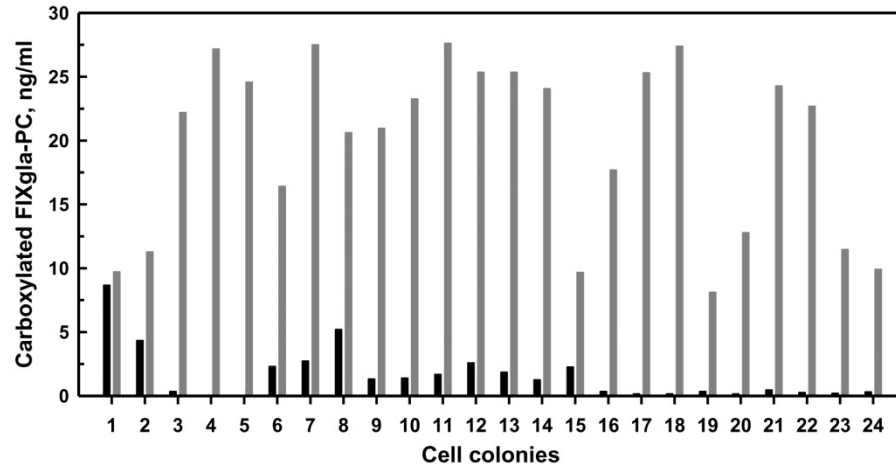**B**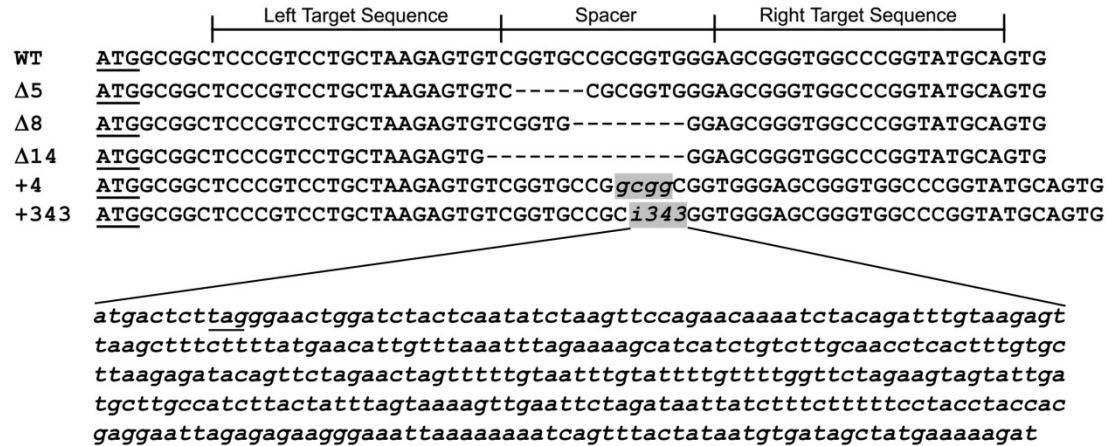**Figure S2**

A

```

1  ATGCGGGCTCCCGTCCTGCTAAGAGTGTGGTGCCGCatgactcttagggaactggatct 60
   M A A P V L L R V S V P H D S * G T G S
61  actcaatatctaagttccagaacaaaatctacagatttgtaagagttaagctttctttaa 120
   T Q Y L S S R T K S T D L * E L S F L L
121 tgaacattgtttaaattagaaaagcatcatctgtcttgcaacctcactttgtgcttaag 180
   * T L F K F R K A S S V L Q P H F V L K
181 agatacagttctagaactagtttttgtaatttgatcttttggttctagaagtagta 240
   R Y S S R T S F C N L Y F V L V L E V V
241 ttgatgcttgccatcttactatcttagtaaaagttgaattctagataattatctttcttt 300
   L M L A I L L F S K S * I L D N Y L S F
301 tcctacctaccacgaggaattagagagaagggaaattaaaaaaaaatcagtttactataat 360
   S Y L P R G I R E K G N * K K S V Y Y N
361 gtgatagctatgaaaagatgggGGGAGCGGGTGGCCCGGTATGCAGTGTGCGCTGCCGG 420
   V I A M K K M V G A G G P V C S V R C R
  
```

B

### Basic Local Alignment Search Tool

Nucleotide Sequence (343 letters)

|                      |              |                      |                         |
|----------------------|--------------|----------------------|-------------------------|
| <b>Query ID</b>      | lcl 50575    | <b>Database Name</b> | Human G+T (2 databases) |
| <b>Description</b>   | None         | <b>Description</b>   | <b>Program</b> BLASTN   |
| <b>Molecule type</b> | nucleic acid |                      | 2.2.27+                 |
| <b>Query Length</b>  | 343          |                      |                         |

| Genomic sequences            | <u>Max score</u> | <u>Total score</u> | <u>Query coverage</u> | <u>E value</u> | <u>Max ident</u> | Links                                                                |
|------------------------------|------------------|--------------------|-----------------------|----------------|------------------|----------------------------------------------------------------------|
| <a href="#">NT_006713.15</a> | 634              | 634                | 100%                  | 2e-179         | 100%             | Homo sapiens chromosome 5 genomic contig, GRCh37.p5 Primary Assembly |

### Alignments

>ref|NT\_006713.15| D Homo sapiens chromosome 5 genomic contig, GRCh37.p5 Primary Assembly Length=42230487

Features flanking this part of subject sequence:  
 374428 bp at 5' side: transmembrane protein 161B  
 79111 bp at 3' side: myocyte-specific enhancer factor 2C isoform 1

Score = 634 bits (343), Expect = 2e-179  
 Identities = 343/343 (100%), Gaps = 0/343 (0%)  
 Strand=Plus/Minus

|       |          |                                                               |                                               |          |
|-------|----------|---------------------------------------------------------------|-----------------------------------------------|----------|
| Query | 1        | ATGACTCTTAGGGA                                                | ACTGGATCTACTCAATATCTAAGTTCAGAACAAAATCTACAGATT | 60       |
| Sbjct | 38533669 | ATGACTCTTAGGGA                                                | ACTGGATCTACTCAATATCTAAGTTCAGAACAAAATCTACAGATT | 38533610 |
| Query | 61       | TGTAAGAGTTAAGCTTTCTTTTATGAACATTGTTTAAATTTAGAAAAGCATCATCTGTCT  |                                               | 120      |
| Sbjct | 38533609 | TGTAAGAGTTAAGCTTTCTTTTATGAACATTGTTTAAATTTAGAAAAGCATCATCTGTCT  |                                               | 38533550 |
| Query | 121      | TGCAACCTCACTTTGTGCTTAAGAGATACAGTCTTAGAACTAGTTTTTGTAAATTTGTATT |                                               | 180      |
| Sbjct | 38533549 | TGCAACCTCACTTTGTGCTTAAGAGATACAGTCTTAGAACTAGTTTTTGTAAATTTGTATT |                                               | 38533490 |
| Query | 181      | TGTTTTGGTCTAGAAAGTAGTATGATGCTTGCCATCTTACTATTTAGTAAAAAGTTGAA   |                                               | 240      |
| Sbjct | 38533489 | TGTTTTGGTCTAGAAAGTAGTATGATGCTTGCCATCTTACTATTTAGTAAAAAGTTGAA   |                                               | 38533430 |
| Query | 241      | TTCTAGATAAATATCTTTCTTTTCTTCTACCTACCACGAGGAATTAGAGAGAAGGGAAATT |                                               | 300      |
| Sbjct | 38533429 | TTCTAGATAAATATCTTTCTTTTCTTCTACCTACCACGAGGAATTAGAGAGAAGGGAAATT |                                               | 38533370 |
| Query | 301      | AAAAAAAAATCAGTTTACTATAATGTGATAGCTATGAAAAAGAT                  | 343                                           |          |
| Sbjct | 38533369 | AAAAAAAAATCAGTTTACTATAATGTGATAGCTATGAAAAAGAT                  | 38533327                                      |          |

Figure S3

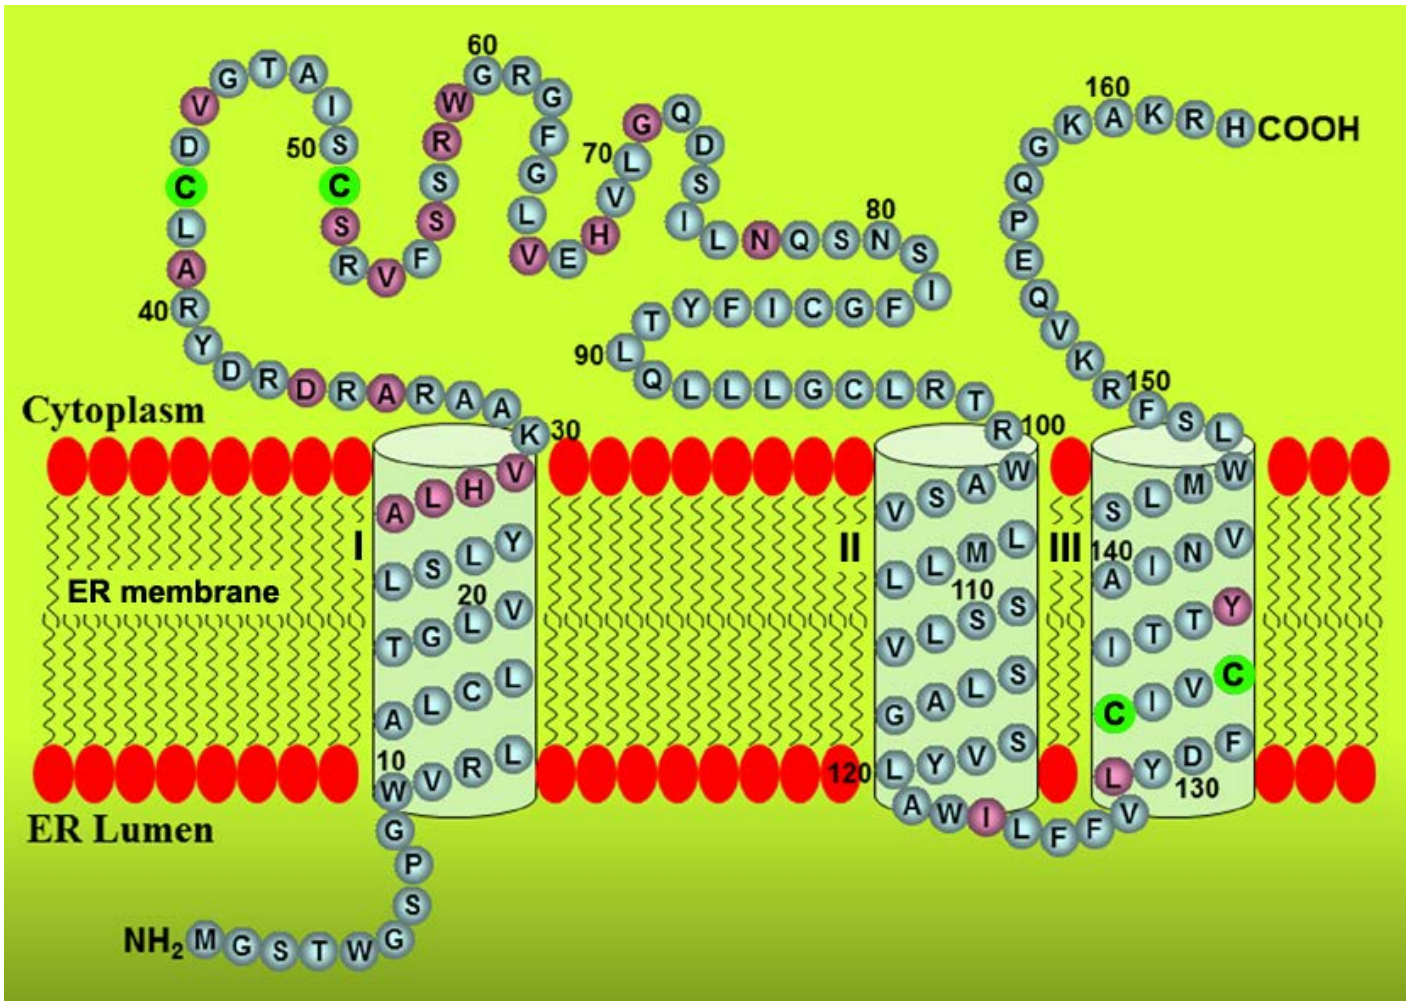

Figure S4
